# Supplementary material
Source: MDPI journal article supplement (https://www.mdpi.com/1424-8247/16/12/1645)

# Identification of Potential Multitarget Compounds against Alzheimer's Disease through Pharmacophore-Based Virtual Screening

Géssica Oliveira Mendes <sup>1</sup>, Moysés Fagundes de Araújo Neto <sup>1</sup>, Deyse Brito Barbosa <sup>1</sup>, Mayra Ramos do Bomfim <sup>1</sup>, Lorena Silva Matos Andrade <sup>2</sup>, Paulo Batista de Carvalho <sup>3</sup>, Tiago Alves de Oliveira <sup>4,5</sup>, Daniel Luciano Falkoski <sup>4</sup>, Eduardo Habib Bechelane Maia <sup>5</sup>, Marcelo Siqueira Valle <sup>6</sup>, Laila Cristina Moreira Damázio <sup>7</sup>, Alisson Marques da Silva <sup>5</sup>, Alex Gutterres Taranto <sup>4</sup> and Franco Henrique Andrade Leite <sup>1,\*</sup>

<sup>1</sup> Laboratory of Molecular Modeling, Department of Health, State University of Feira de Santana, Feira de Santana 44036-900 BA, Brazil; gomendes05@gmail.com (G.O.M.); moysesfagundes@gmail.com (M.F.d.A.N.); deyse.brito@hotmail.com (D.B.B.); mayramosbonfim@hotmail.com (M.R.d.B.)

<sup>2</sup> Laboratory of Chemoinformatics and Biological Assessment, Department of Health, State University of Feira de Santana, Feira de Santana 44036-900, BA, Brazil; lorena.pharm@gmail.com

<sup>3</sup> Feik School of Pharmacy, University of the Incarnate Word, San Antonio, TX 78212, USA; pcarvalh@uiwtx.edu

<sup>4</sup> Department of Bioengineering, Federal University of São João del-Rei, São João del-Rei 36301-160, MG, Brazil; tiagofga@cefetmg.br (T.A.d.O.); dlfalkoski@yahoo.com.br (D.L.F.); proftaranto@hotmail.com (A.G.T.)

<sup>5</sup> Department of Informatics, Management and Design, Federal Center for Technological Education of Minas Gerais (CEFET-MG), Divinópolis 35503-822, MG, Brazil; habib@cefetmg.br (E.H.B.M.); alisson@cefetmg.br (A.M.d.S.)

<sup>6</sup> Department of Natural Sciences, Federal University of São João del-Rei, São João del-Rei 36301-160, MG, Brazil; marcelovalle@gmail.com (M.S.V.)

<sup>7</sup> Department of Medicine, Federal University of São João del-Rei, São João del-Rei 36301-160, MG, Brazil; lailacmdamazio@gmail.com (L.C.M.D.)

\* Correspondence: fhenrique@uefs.br (F.H.A.L.)

**Table S1.** Scores of the three best compounds selected through molecular docking by AutoDock Vina 1.1.2.

| <b>Molecule</b> | <b>AChE *</b> | <b>BChE *</b> | <b>BACE-1 *</b> |
|-----------------|---------------|---------------|-----------------|
| ZINC45068352    | -9.6          | -10.4         | -9.9            |
| ZINC03873986    | -10.6         | -11.2         | -12.2           |
| ZINC71787288    | -9.6          | -10.6         | -9.6            |

\*kcal/mol - lower energy indicates better docking

**Table S2.** Scores of the three best compounds selected through molecular docking by GOLD.

| <b>Molecule</b> | <b>AChE *</b> | <b>BChE *</b> | <b>BACE-1 *</b> |
|-----------------|---------------|---------------|-----------------|
| ZINC45068352    | 58.82         | 63.25         | 43.32           |
| ZINC03873986    | 68.49         | 37.38         | 41.54           |
| ZINC71787288    | 57.65         | 56.64         | 41.91           |

\*dimensionless - Higher numbers indicate better docking

**Table S3.** Toxicological analysis of the remaining molecules.

| Molecule     | Maximum Tolerated dose (human) | hERG I inhibitor | Oral Rat Acute Toxicity (LD50) | Oral Rat Chronic Toxicity (LOAEL) | Hepatotoxicity | Skin Sensitization | T.Pyriiformis toxicity | Minnow toxicity |
|--------------|--------------------------------|------------------|--------------------------------|-----------------------------------|----------------|--------------------|------------------------|-----------------|
| ZINC03873986 | 0.695                          | No               | 2.499                          | 3.126                             | No             | No                 | 0.286                  | -0.457          |
| ZINC71787288 | 0.639                          | No               | 2.709                          | 2.23                              | Yes            | No                 | 0.321                  | -0.361          |

**Table S4.** Chemical structure and biological activity of inhibitors against BACE-1 used in generating pharmacophore models.

| N <sup>o</sup> | Chemical structure                                                                  | IC <sub>50</sub> (nM) |
|----------------|-------------------------------------------------------------------------------------|-----------------------|
| 1              | 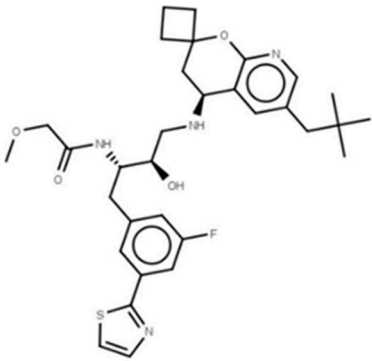   | 1.9                   |
| 11             |   | 9.1                   |
| 17             |  | 16                    |
| 19             |  | 19.5                  |

22

22.8

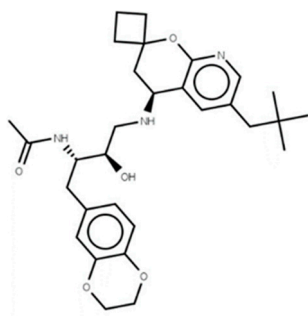

28

39

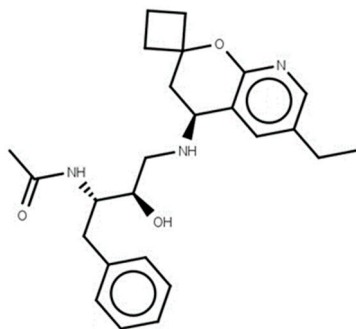

31

47

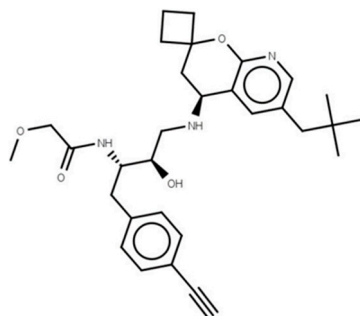

32

48

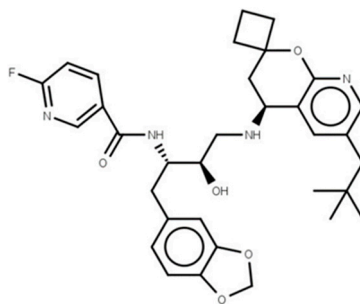

38

79.98

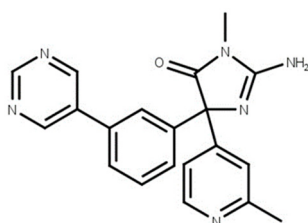

39

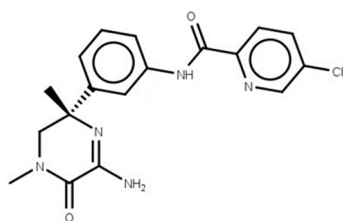

83

40

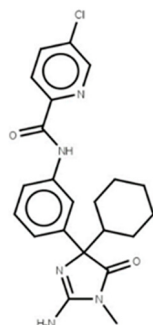

100

41

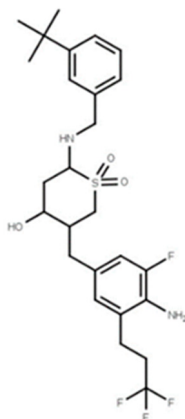

130

42

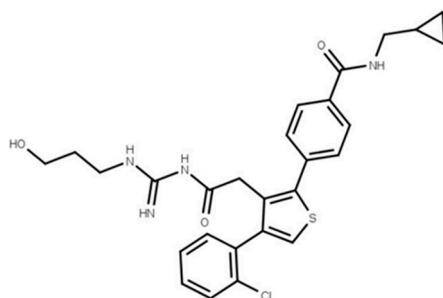

140

44

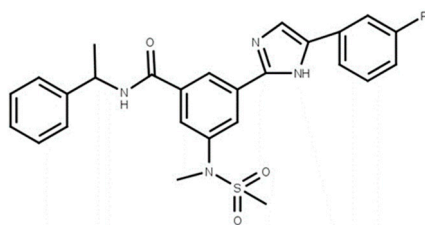

187

**Table S5.** Chemical structure and biological activity of inhibitors against BACE-1 that were used in evaluating pharmacophore models.

| Nº | Chemical structure                                                                  | IC <sub>50</sub> (nM) |
|----|-------------------------------------------------------------------------------------|-----------------------|
| 2  | 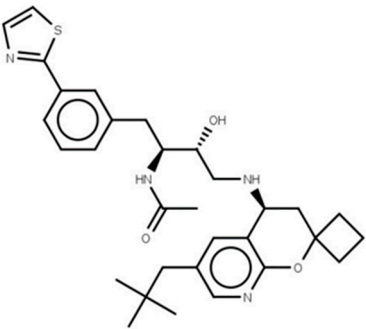   | 3.7                   |
| 3  |    | 4                     |
| 4  |   | 4.1                   |
| 5  |  | 5                     |

6

5.2

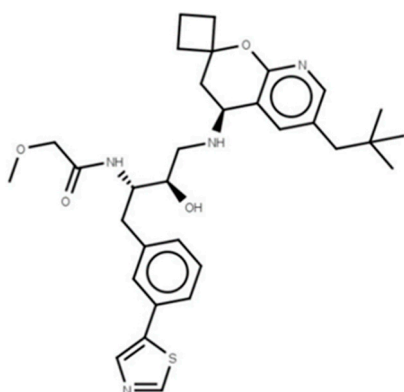

7

5.4

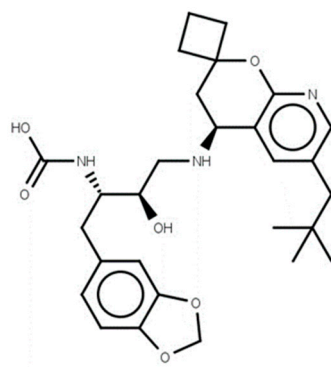

8

6.1

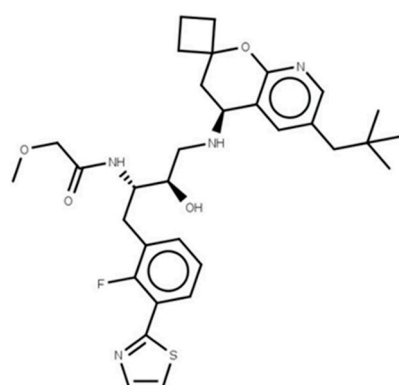

9

6.9

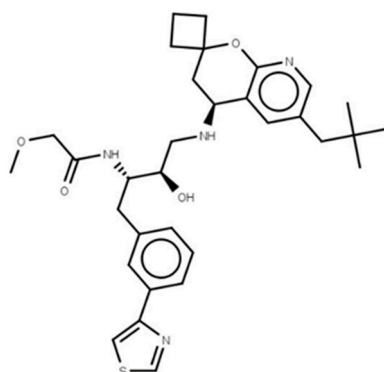



10

7.2

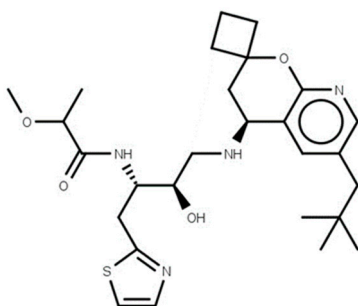

12

9.3

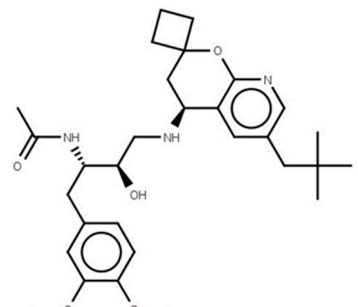

13

9.5

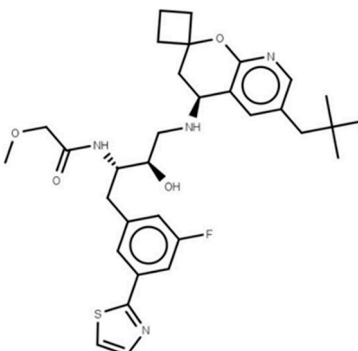

14

9.6

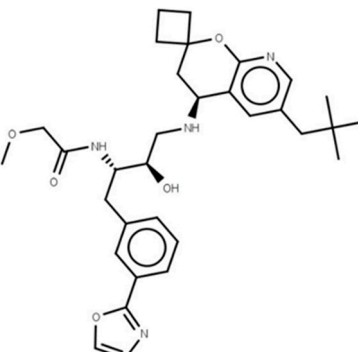

15

9.8

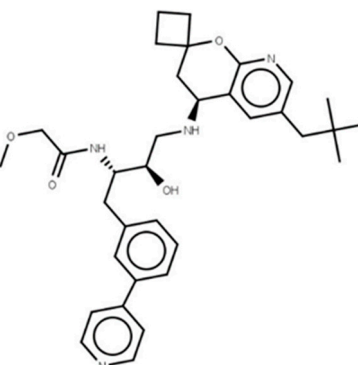

16

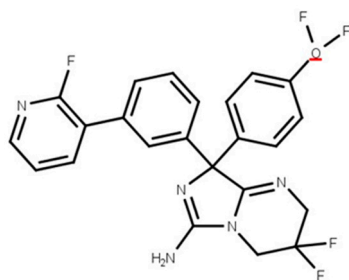

12.59

18

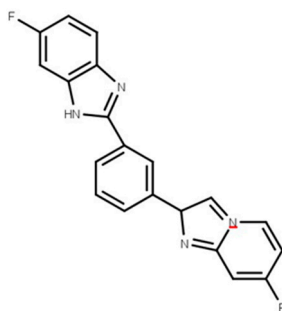

18

20

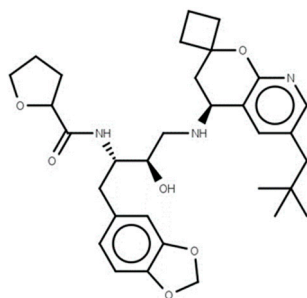

20.4

21

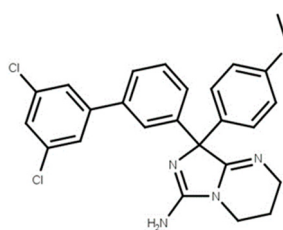

22.39

23

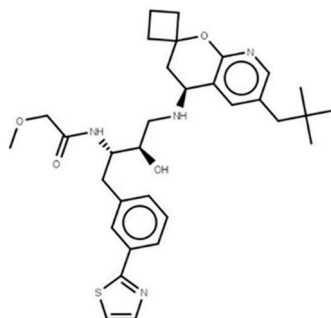

26

24

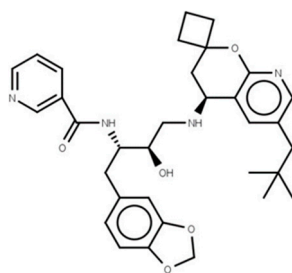

26.1

25

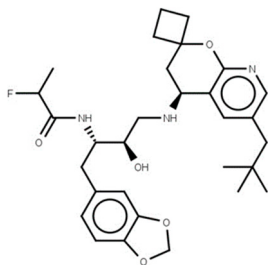

28.9

26

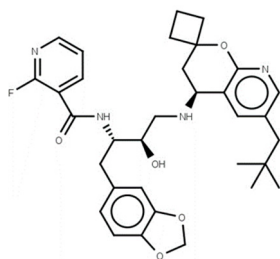

33.2

27

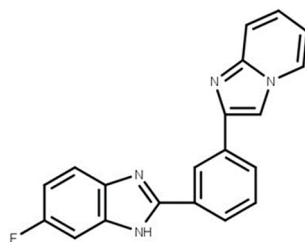

35

29

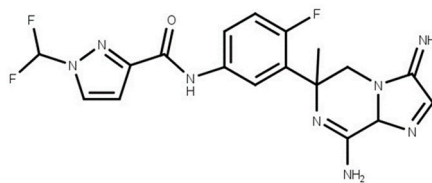

46.67

30

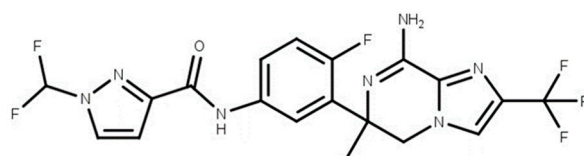

46.77

33

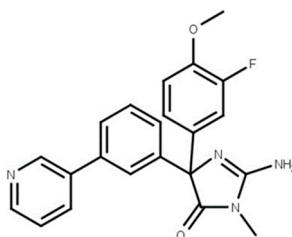

50

34

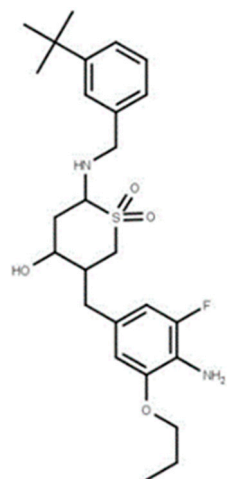

56

35

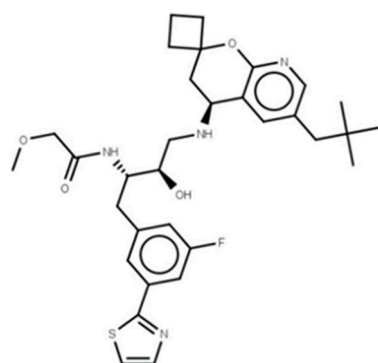

71

36

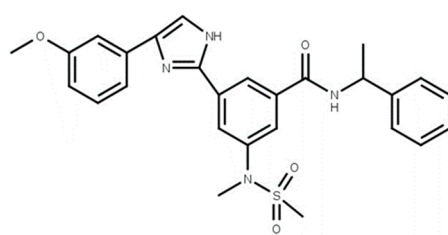

77

37

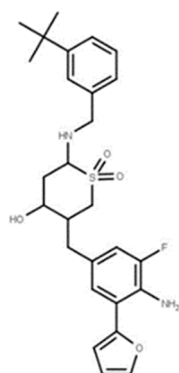

79

43

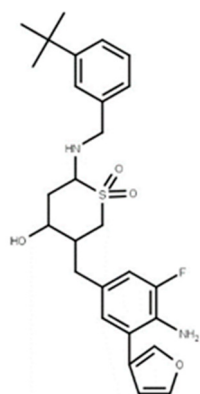

150

45

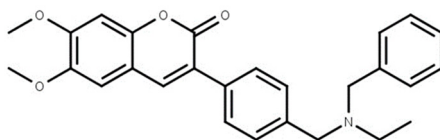

238

46

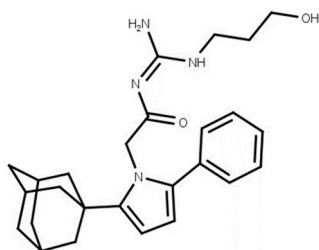

239

47

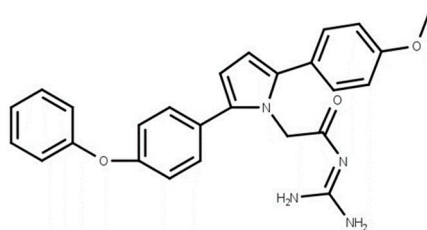

500

48

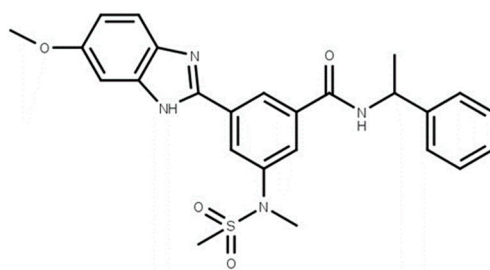

545

49

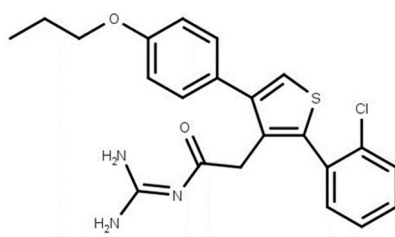

590

50

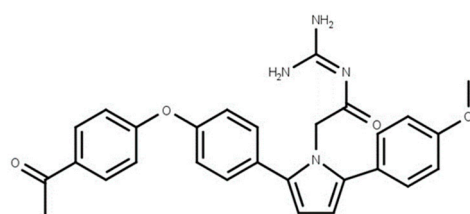

600

51

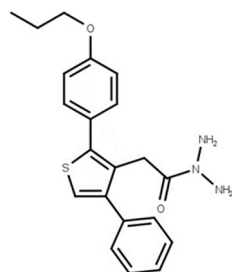

680

52

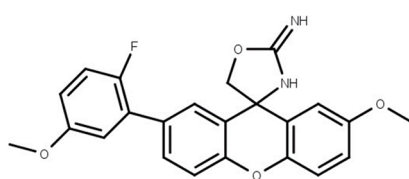

740

53

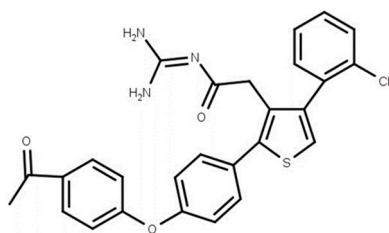

750

54

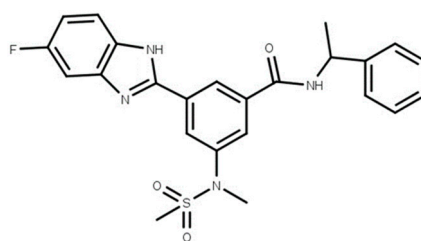

786

55

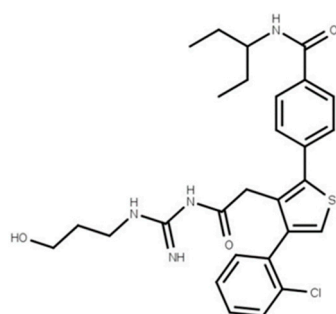

930

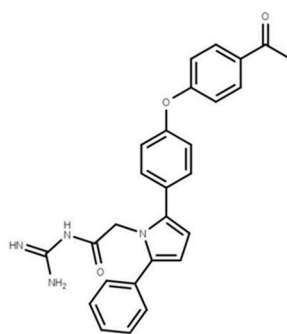

Supplement: s1 [file s1]
